# Supplementary material
Source: publisher figshare collection journal article supplement (https://geolsoc.figshare.com/articles/dataset/_/3453965)

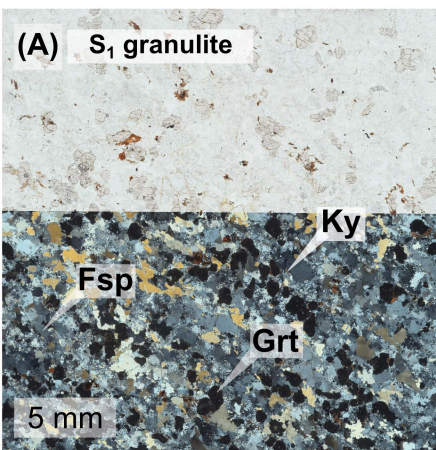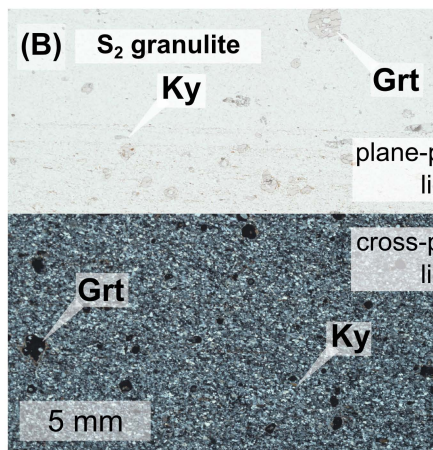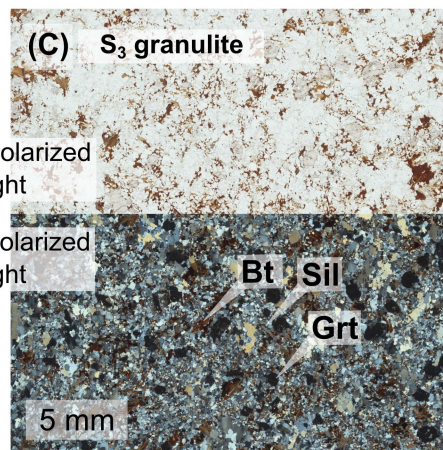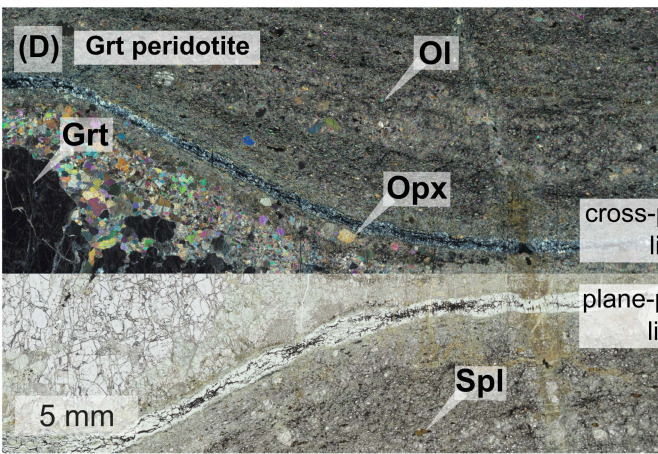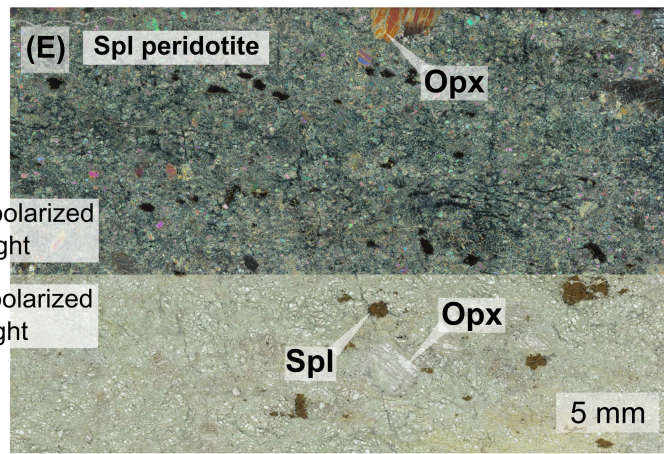

Supplement: Supplementary file 1 [file 1]

Sampling sites

- ★ granulite
- ★ peridotite
- dated s.

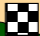

Mohelno

WK177L2  
17  
15  
16  
WK92

6  
7  
WK201  
WK188

3  
2  
4  
WK198  
8  
WK196

11  
10  
13

5

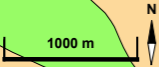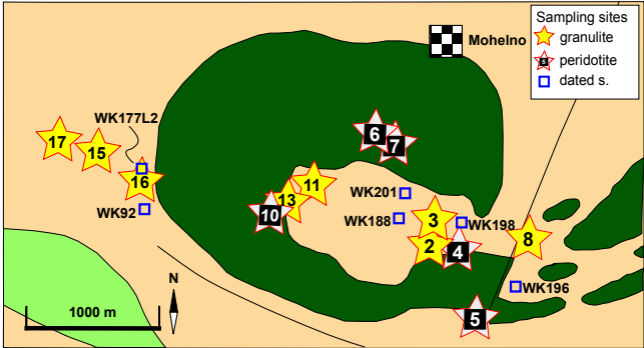

Supplement: Supplementary file 2 [file 1]

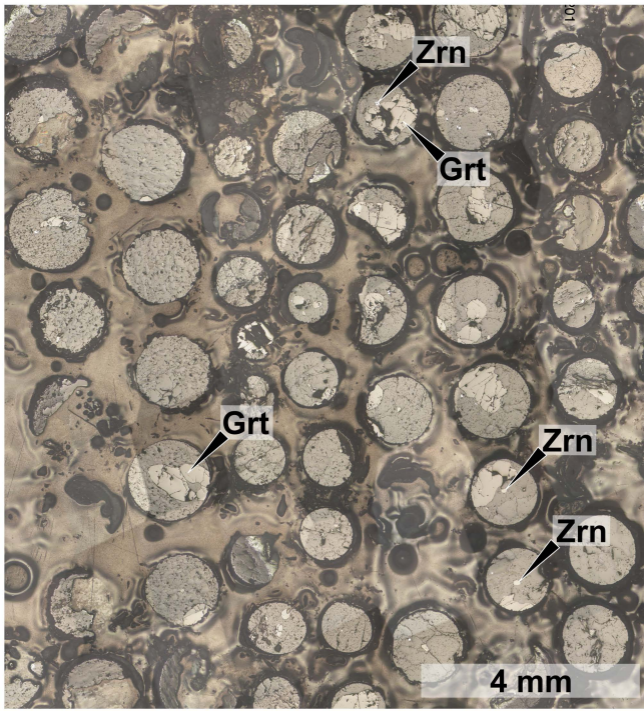

Zrn

Grt

Grt

Zrn

Zrn

4 mm

Supplement: Supplementary file 3 [file 1]

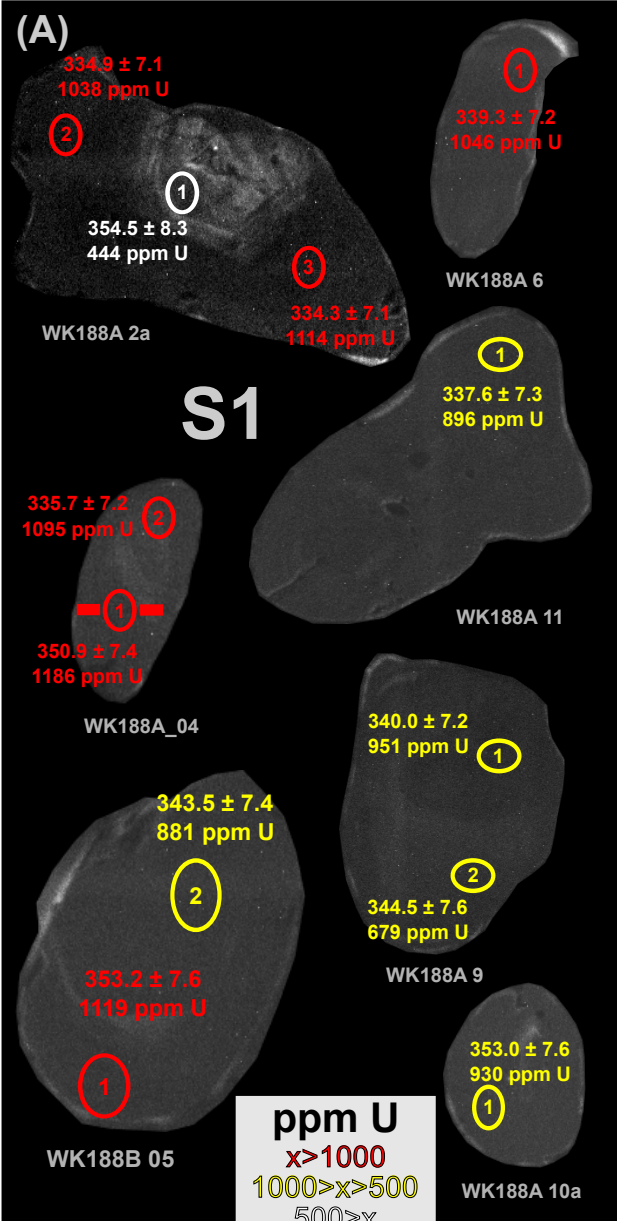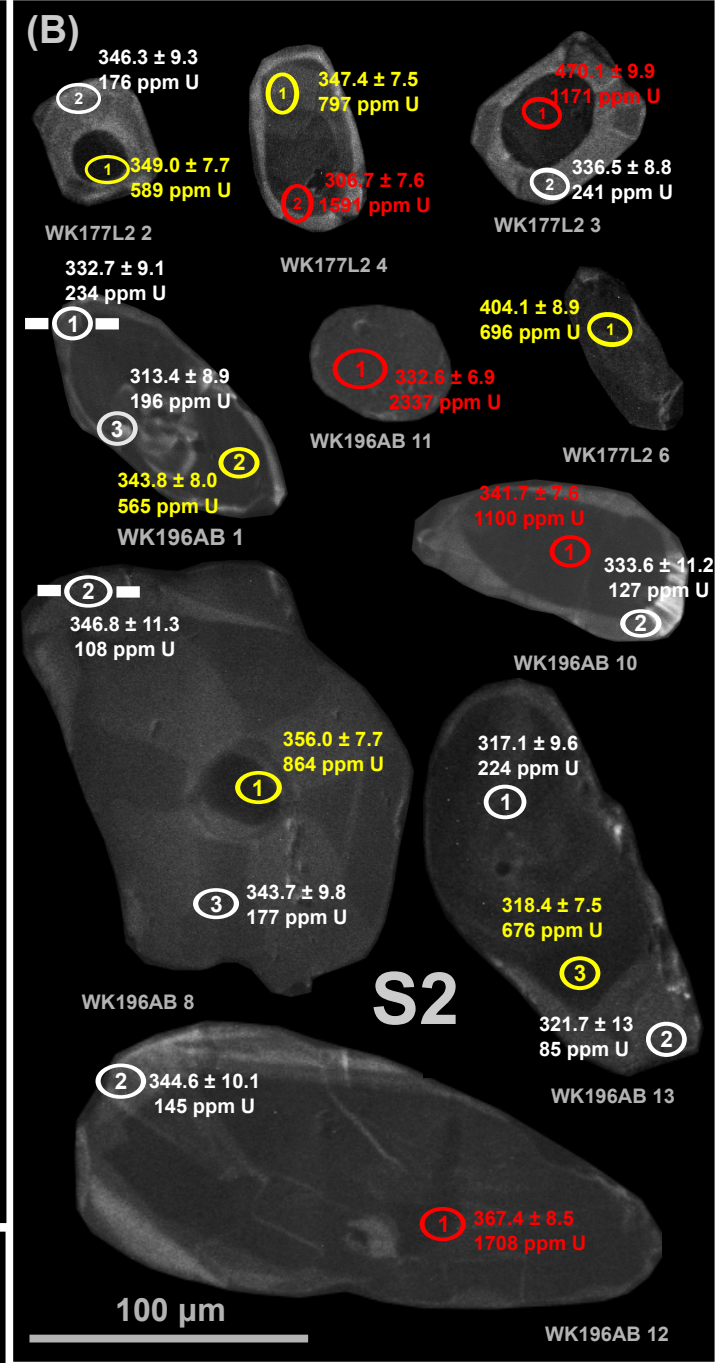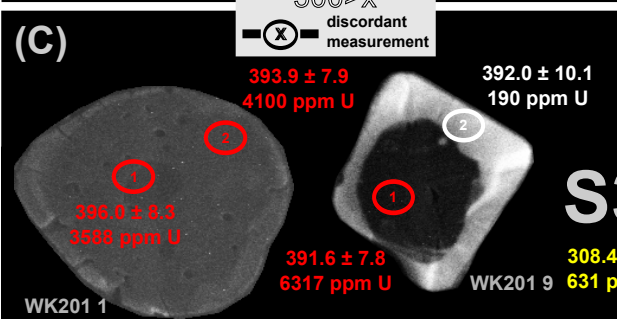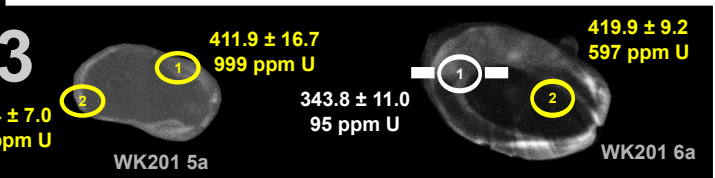

Supplement: Supplementary file 4 [file 1]

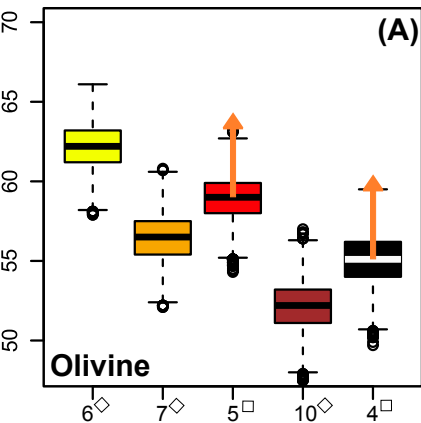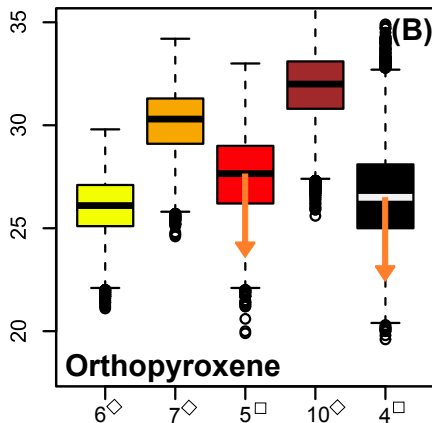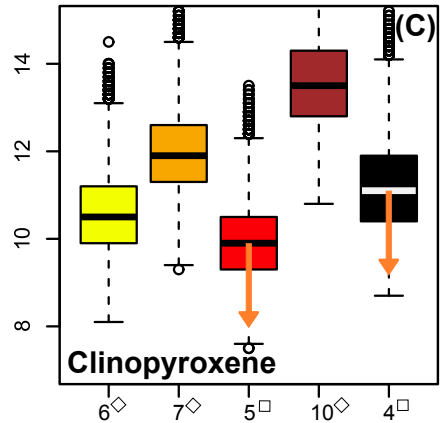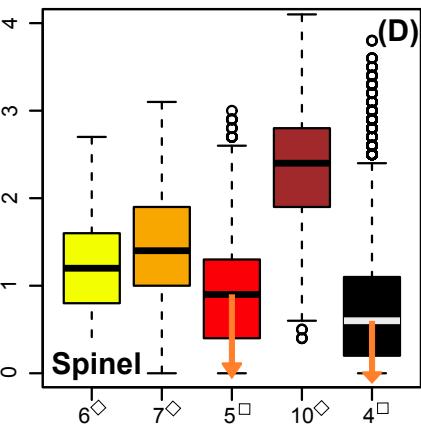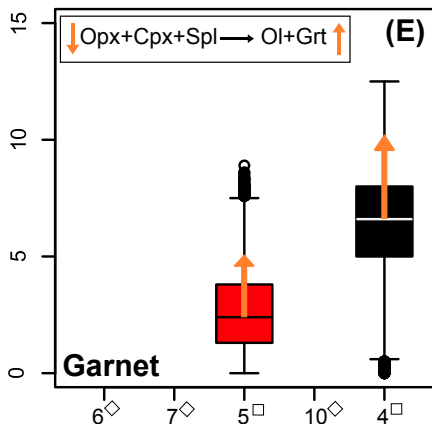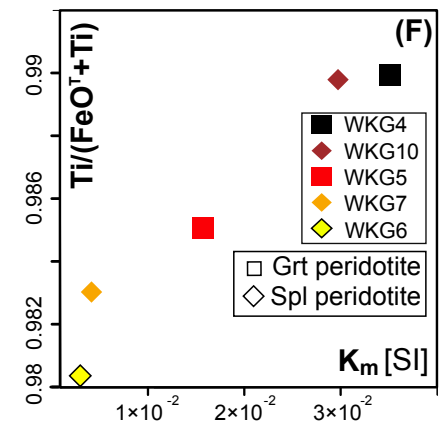

Supplement: Supplementary file 5 [file 1]

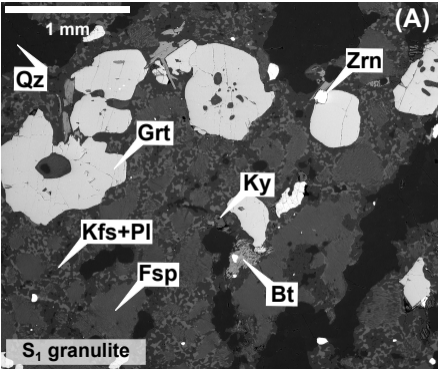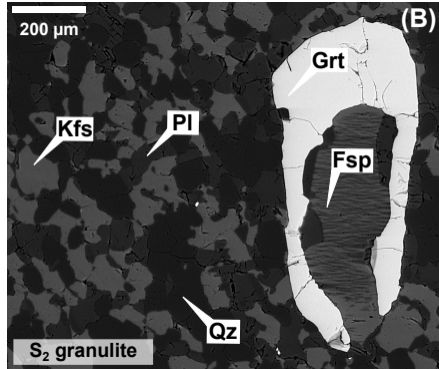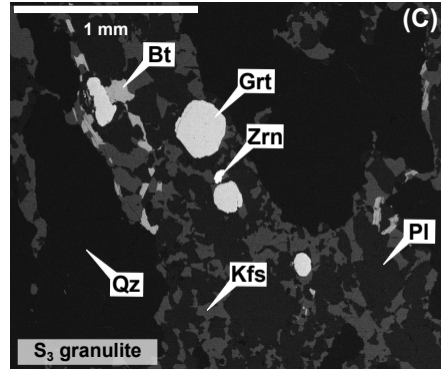

Supplement: Supplementary file 6 [file 1]
